# Supplementary material
Source: publisher site journal article supplement (https://www.jstage.jst.go.jp/article/geochemj/47/2/47_2.0230/_supplement/_download/47_2.0230_1.pdf)
Supplement: Supplementary file 1 [file 47_2.0230_1.pdf]

## SUPPLEMENTARY MATERIALS

### Estimation of $^{230}\text{Th}$ -normalized fluxes of biogenic components

To interpret results in terms of export production of biogenic components or the supply of lithogenic material, fluxes to the sea floor have been reconstructed by using the core age model to calculate mass accumulation rates (MARs) as follows:

$$\text{MAR}_{i,j} = \rho_{i,j} \times \text{LSR}_{i,j}, \quad (\text{S1})$$

where  $\rho_{i,j}$  is the dry bulk density ( $\text{g cm}^{-3}$ ) of a sediment section between depths  $i$  and  $j$ , and the LSR ( $\text{cm kyr}^{-1}$ ) is calculated as  $(z_j - z_i)/(t_j - t_i)$ , where  $z_j$  and  $z_i$  are the depths of sediment horizons  $j$  and  $i$  (cm), and  $t_j$  and  $t_i$  are the corresponding calendar ages (kyr). In contrast, the  $^{230}\text{Th}$ -normalization method is based on the assumption that the flux of scavenged  $^{230}\text{Th}$  ( $^{230}\text{Th}^{\text{scav}}$ ) reaching the seafloor ( $F_{230}$ ) is known and equal to the rate of  $^{230}\text{Th}$  production ( $P_{230}$ ) from the decay of  $^{234}\text{U}$  in the overlying water column. Therefore, the activity (A) of  $^{230}\text{Th}$  in a sediment sample ( $\text{dpm g}^{-1}$ ) can be expressed as:

$$A(^{230}\text{Th}^{\text{scav}}) = F_{230}/F_v. \quad (\text{S2})$$

$F_{230}$  ( $\text{dpm cm}^{-2} \text{ kyr}^{-1}$ ) is known and is approximately equal to  $\beta_{230}Z$ , where  $\beta_{230}$  ( $\text{dpm cm}^{-3} \text{ kyr}^{-1}$ ) is determined by the balance between the radioactive decay of dissolved  $^{234}\text{U}$  and the  $^{230}\text{Th}$  decay constant ( $\lambda_{230}$ ) throughout the water column and  $Z$  is the water depth (m).  $F_v$  ( $\text{g cm}^{-2} \text{ kyr}^{-1}$ ) is the vertical flux of particulate material in the water column.  $\beta_{230}$  is exactly known throughout the water column (François *et al.*, 2004 and references therein):

$$\beta_{230} = \lambda_{230}^{\text{sw}} \times {}^{\text{sw}}A^{234}\text{U}, \quad (\text{S3})$$

where values of  $\lambda_{230}^{\text{sw}}$  (decay constant of  $^{230}\text{Th}$  in seawater) and  ${}^{\text{sw}}A^{234}\text{U}$  (activity of  $^{234}\text{U}$  in seawater,  $\text{dpm kg}^{-1}$ ) depend on salinity. For this study, we assumed a salinity of 35 and used  $2.84 \text{ dpm kg}^{-1}$  for  ${}^{\text{sw}}A^{234}\text{U}$  (Chen *et al.*, 1986). This assumption is justified *a priori* by the short residence time of  $^{230}\text{Th}$ , which varies from a few months in surface water to about 50 years in Pacific bottom waters (Bacon and Rosholt, 1982; Bacon, 1984; François *et al.*, 2004). Moreover, the validity of this assumption has been confirmed by a modeling study (Henderson *et al.*, 1999) and a sediment trap investigation (Yu *et al.*, 2001). Therefore, this method is useful for the estimation of the preserved vertical flux (PVF) of biogenic materials, that is, the export flux after diagenetic remineralization.

The PVF ( $\text{g}$  or  $\text{mg cm}^{-2} \text{ kyr}^{-1}$ ) normalized to  $^{230}\text{Th}$  is calculated as follows (François *et al.*, 2004):

$$\text{PVF}(i) = (\beta_{230} \times Z \times f_{(i)})^0 A(^{230}\text{Th}^{\text{scav}}), \quad (\text{S4})$$

where  $f_{(i)}$  is the weight fraction of constituent  $i$  in the sediment. We corrected  $Z$  for the global sea level during each period associated with climate change (Lambeck *et al.*, 2002; Yokoyama and Esat, 2011).  ${}^0A(^{230}\text{Th}^{\text{scav}})$  is the initial activity of  $^{230}\text{Th}^{\text{scav}}$  as defined by Eq. (S5), which corrects for the radioactive decay of  $^{230}\text{Th}$  (half-life, 75.7 kyr):

$${}^0A(^{230}\text{Th}^{\text{scav}}) = A(^{230}\text{Th}^{\text{scav}}) \times \exp(0.693t/75.7). \quad (\text{S5})$$

The analysis of  $^{230}\text{Th}$  in sediment for this study was carried out after total dissolution of the sample, yielding total sediment  $^{230}\text{Th}$  ( $A[^{230}\text{Th}^{\text{meas}}]$ ). This was corrected for contributions from detrital  $^{230}\text{Th}$  ( $^{230}\text{Th}^{\text{det}}$ ) and, occasionally, authigenic  $^{230}\text{Th}$  ( $^{230}\text{Th}^{\text{auth}}$ ) by using Eq. (S6):

$$A(^{230}\text{Th}^{\text{scav}}) = A(^{230}\text{Th}^{\text{meas}}) - A(^{230}\text{Th}^{\text{det}}) - A(^{230}\text{Th}^{\text{auth}}), \quad (\text{S6})$$

where  $A(^{230}\text{Th}^{\text{det}})$ , which equals  $A(^{238}\text{U}^{\text{det}})$ , was determined from the activity of sedimentary  $^{232}\text{Th}$ , an isotope of Th that is found almost exclusively in the lithogenic fraction. The lithogenic  $A^{238}\text{U}/A^{232}\text{Th}$  ratio is  $0.75 \pm 0.2$  on average (Anderson, 1982), and Henderson and Anderson (2003) have reported mean  $A^{238}\text{U}/A^{232}\text{Th}$  ratios for each oceanic basin (Southern Ocean,  $0.4 \pm 0.1$ ; Pacific,  $0.7 \pm 0.1$ ; Atlantic,  $0.6 \pm 0.1$ ). In this study, we used 0.4 for the  $A^{238}\text{U}/A^{232}\text{Th}$  ratio.  $A(^{232}\text{Th})$  in sediment equals  $A(^{232}\text{Th}^{\text{det}})$  and, thus,  $A(^{232}\text{Th}^{\text{det}}) = A(^{232}\text{Th}^{\text{meas}})$ . In sediment, authigenic  $^{230}\text{Th}$  produced from the decay of  $^{234}\text{U}$  is calculated as follows:

$$A(^{230}\text{Th}^{\text{auth}}) = A(^{234}\text{U}^{\text{auth}}) \times \{1 - \exp[-(0.693t/75.7)]\}. \quad (\text{S7})$$

Using the ratio of  $A(^{234}\text{U}^{\text{auth}})/A(^{238}\text{U}^{\text{auth}})$  in the water column, 1.144 (Chen *et al.*, 1986), the activity of authigenic  $^{230}\text{Th}$  was then estimated as:

$$A(^{230}\text{Th}^{\text{auth}}) = 1.144 \times A(^{238}\text{U}^{\text{auth}}) \times \{1 - \exp[-(0.693t/75.7)]\}, \quad (\text{S8})$$

where  $A(^{238}\text{U}^{\text{auth}})$  is the activity of authigenic U, determined as  $A(^{238}\text{U}^{\text{meas}})$  minus  $A(^{238}\text{U}^{\text{det}})$ , which is equal to  $0.4 \times A(^{232}\text{Th}^{\text{meas}})$ . The general equation for calculating scavenged  $^{230}\text{Th}$  in the sediment then becomes:

$$A(^{230}\text{Th}^{\text{scav}}) = A(^{230}\text{Th}^{\text{meas}}) - [0.4 \times A(^{232}\text{Th}^{\text{meas}})] - 1.144 \times A[^{238}\text{U}^{\text{meas}} - 0.4 \times A(^{232}\text{Th}^{\text{meas}})] \times \{1 - \exp[-(0.693t/75.7)]\}, \quad (\text{S9})$$

where  $t$  is the sedimentation age (kyr) (François *et al.*,

2004). The PVF (g or mg cm<sup>-2</sup> kyr<sup>-1</sup>) normalized to <sup>230</sup>Th, Eq. (S4) was used to estimate the paleo-fluxes of biogenic materials in this study.

*Estimation of focusing factor*

The <sup>230</sup>Th<sup>scav</sup> inventory in the sediment between core depths  $z_j$  and  $z_i$  should match the production in the overlying column ( $P_{230}$ ) integrated over the time of accumulation of this depth interval, after correction for radioactive decay. Using this principle, Suman and Bacon (1989) defined a focusing factor ( $\Psi$ ) that quantifies syndepositional sediment redistribution:

$$\text{Focusing factor } (\Psi) = \frac{\int_{z_i}^{z_j} ({}^0A({}^{230}\text{Th}^{\text{scav}}) \times \rho_{i,j}) dz}{\int_{t_i}^{t_j} P_{230} dz} \quad (\text{S10})$$

where  $r$  is depth (cm) in the core,  $\rho_{i,j}$  is dry bulk density (g cm<sup>-3</sup>) between  $i$  and  $j$  (cm), and  $t_i$  and  $t_j$  are the corresponding calendar ages (kyr) of  $i$  and  $j$ , respectively.  ${}^0A({}^{230}\text{Th}^{\text{scav}})$  is the initial activity of <sup>230</sup>Th<sup>scav</sup>, and  $P_{230}$  (dpm cm<sup>-2</sup> kyr<sup>-1</sup>) is the rate of <sup>230</sup>Th production from the decay of <sup>234</sup>U in the overlying water column (m).

Supplementary Table S1. Calculated and measured parameters for sediment core PC-1, including TOC, TN, CaCO<sub>3</sub>, and Si<sub>OPAL</sub> contents, C/N, opal/CaCO<sub>3</sub> ratio, and stable oxygen isotope ratio in tests of the planktic foraminifer *G.bulloides*.

| Core | Depth<br>(cm) | Age<br>(cal kyr BP) | Linear<br>sedimentation<br>rate<br>(cm kyr <sup>-1</sup> ) | Dry bulk<br>density<br>(g cm <sup>-3</sup> ) | Total org.<br>C<br>(wt %) | Total<br>nitrogen<br>(wt %) | C/N | Si <sub>OPAL</sub><br>(wt %) | CaCO <sub>3</sub><br>(wt %) | δ <sup>18</sup> O<br>(‰ vs PDB) |
|------|---------------|---------------------|------------------------------------------------------------|----------------------------------------------|---------------------------|-----------------------------|-----|------------------------------|-----------------------------|---------------------------------|
| PC1  | 20.9          | 3.0                 | 6.9                                                        | 0.89                                         | 2.0                       | 0.23                        | 8.7 | 7.3                          | 1.2                         |                                 |
|      | 23.1          | 3.3                 | 7.5                                                        | 0.88                                         | 2.0                       | 0.23                        | 8.7 |                              | 0.71                        |                                 |
|      | 25.3          | 3.6                 | 7.5                                                        | 0.89                                         | 1.8                       | 0.22                        | 8.5 |                              | 1.4                         |                                 |
|      | 27.5          | 3.9                 | 7.5                                                        | 0.89                                         | 1.9                       | 0.22                        | 8.7 |                              | 1.1                         |                                 |
|      | 29.7          | 4.2                 | 7.5                                                        | 0.88                                         | 2.0                       | 0.22                        | 8.9 |                              | 1.0                         |                                 |
|      | 31.9          | 4.5                 | 7.5                                                        | 0.91                                         | 1.9                       | 0.21                        | 8.9 | 6.7                          | 1.1                         |                                 |
|      | 34.1          | 4.8                 | 7.5                                                        | 0.89                                         | 2.0                       | 0.22                        | 9.1 |                              | 1.2                         |                                 |
|      | 36.3          | 5.1                 | 7.5                                                        | 0.88                                         | 1.9                       | 0.22                        | 9.0 |                              | 0.86                        |                                 |
|      | 38.5          | 5.4                 | 7.5                                                        | 0.86                                         | 1.9                       | 0.22                        | 8.6 |                              | 1.4                         |                                 |
|      | 40.7          | 5.7                 | 7.5                                                        | 0.92                                         | 1.9                       | 0.21                        | 9.0 | 6.3                          | 1.5                         |                                 |
|      | 42.9          | 6.0                 | 7.5                                                        | 1.0                                          | 1.9                       | 0.21                        | 9.1 |                              | 1.3                         |                                 |
|      | 45.1          | 6.3                 | 7.5                                                        | 1.0                                          | 1.8                       | 0.20                        | 8.9 |                              | 1.3                         |                                 |
|      | 47.3          | 6.6                 | 7.5                                                        | 0.92                                         | 1.9                       | 0.21                        | 8.9 |                              | 1.3                         |                                 |
|      | 49.5          | 6.9                 | 7.5                                                        | 0.93                                         | 1.8                       | 0.20                        | 8.8 |                              | 0.5                         |                                 |
|      | 51.7          | 7.1                 | 7.5                                                        | 0.92                                         | 1.8                       | 0.20                        | 9.0 | 6.9                          | 0.7                         |                                 |
|      | 53.9          | 7.4                 | 7.5                                                        | 0.84                                         | 1.7                       | 0.20                        | 8.8 |                              | 1.2                         |                                 |
|      | 56.1          | 7.7                 | 7.5                                                        | 0.86                                         | 1.8                       | 0.21                        | 8.8 |                              | 1.5                         |                                 |
|      | 58.3          | 8.0                 | 7.5                                                        | 0.89                                         | 1.7                       | 0.19                        | 9.0 |                              | 1.6                         |                                 |
|      | 60.5          | 8.3                 | 7.5                                                        | 0.84                                         | 1.8                       | 0.20                        | 8.8 | 6.2                          | 1.9                         |                                 |
|      | 62.7          | 8.6                 | 7.5                                                        | 0.88                                         | 1.7                       | 0.19                        | 8.9 |                              | 2.0                         |                                 |
|      | 64.9          | 8.9                 | 7.5                                                        | 0.92                                         | 1.6                       | 0.18                        | 8.9 |                              | 2.0                         |                                 |
|      | 67.1          | 9.2                 | 7.5                                                        | 1.0                                          | 1.4                       | 0.16                        | 8.8 |                              | 2.2                         |                                 |
|      | 69.3          | 9.5                 | 7.5                                                        | 0.90                                         | 1.8                       | 0.20                        | 9.0 |                              | 2.0                         |                                 |
|      | 71.5          | 9.8                 | 7.5                                                        | 0.87                                         | 1.8                       | 0.19                        | 9.3 | 6.8                          | 1.6                         |                                 |
|      | 73.7          | 10.1                | 7.5                                                        | 0.87                                         | 1.8                       | 0.20                        | 9.2 | 6.0                          | 1.7                         |                                 |
|      | 75.9          | 10.2                | 26.4                                                       | 0.86                                         | 1.9                       | 0.22                        | 8.8 |                              | 1.4                         |                                 |
|      | 78.1          | 10.2                | 26.4                                                       | 0.83                                         | 1.9                       | 0.20                        | 9.3 |                              | 1.7                         |                                 |
|      | 80.3          | 10.3                | 26.4                                                       | 0.87                                         | 1.8                       | 0.20                        | 9.1 |                              | 1.7                         |                                 |
|      | 82.5          | 10.4                | 26.4                                                       | 0.84                                         | 1.7                       | 0.20                        | 8.8 | 6.6                          | 2.3                         |                                 |
|      | 84.7          | 10.5                | 26.4                                                       | 0.87                                         | 1.7                       | 0.19                        | 8.7 |                              | 2.7                         |                                 |
|      | 86.9          | 10.6                | 26.4                                                       | 0.83                                         | 1.7                       | 0.20                        | 8.7 |                              | 2.6                         |                                 |
|      | 89.1          | 10.7                | 26.4                                                       | 0.87                                         | 1.6                       | 0.18                        | 9.2 |                              | 3.1                         |                                 |
|      | 91.3          | 10.7                | 26.4                                                       | 0.84                                         | 1.6                       | 0.19                        | 8.6 | 6.2                          | 3.3                         |                                 |
|      | 93.5          | 10.8                | 26.4                                                       | 0.88                                         | 1.6                       | 0.18                        | 8.9 |                              | 3.8                         |                                 |
|      | 95.7          | 10.9                | 26.4                                                       | 0.85                                         | 1.6                       | 0.18                        | 8.8 |                              | 3.4                         |                                 |
|      | 97.9          | 11.0                | 26.4                                                       | 0.88                                         | 1.6                       | 0.18                        | 8.9 |                              | 3.0                         |                                 |
|      | 100           | 11.1                | 26.4                                                       | 0.89                                         | 1.5                       | 0.17                        | 8.9 |                              | 3.8                         |                                 |
|      | 102           | 11.2                | 26.4                                                       | 0.88                                         | 1.5                       | 0.16                        | 9.5 | 6.1                          | 2.8                         |                                 |
|      | 105           | 11.2                | 26.4                                                       | 0.85                                         | 1.7                       | 0.19                        | 9.1 |                              | 2.6                         |                                 |
|      | 107           | 11.3                | 26.4                                                       | 1.0                                          | 1.4                       | 0.15                        | 9.1 |                              | 3.5                         |                                 |
|      | 109           | 11.4                | 26.4                                                       | 0.90                                         | 1.3                       | 0.15                        | 9.0 |                              | 3.3                         |                                 |
|      | 111           | 11.5                | 26.4                                                       | 0.93                                         | 1.3                       | 0.14                        | 9.1 | 7.6                          | 3.2                         |                                 |
|      | 113           | 11.6                | 26.4                                                       | 0.95                                         | 1.3                       | 0.15                        | 9.0 |                              | 3.2                         |                                 |
|      | 116           | 11.7                | 26.4                                                       | 1.0                                          | 1.1                       | 0.13                        | 8.9 |                              | 3.3                         |                                 |
|      | 118           | 11.7                | 26.4                                                       | 1.0                                          | 1.0                       | 0.12                        | 8.8 |                              | 3.1                         | 1.1                             |
|      | 120           | 11.8                | 26.4                                                       | 1.0                                          | 1.1                       | 0.13                        | 8.8 |                              | 3.1                         |                                 |
|      | 122           | 11.9                | 26.4                                                       | 1.0                                          | 1.2                       | 0.14                        | 8.1 | 7.7                          | 2.8                         |                                 |
|      | 124           | 12.0                | 26.4                                                       | 1.0                                          | 1.1                       | 0.12                        | 8.7 |                              | 3.1                         |                                 |
|      | 127           | 12.1                | 26.4                                                       | 1.0                                          | 1.0                       | 0.11                        | 9.0 |                              | 3.0                         | 0.95                            |
|      | 129           | 12.2                | 26.4                                                       | 1.0                                          | 1.1                       | 0.12                        | 8.7 |                              | 2.7                         |                                 |

Supplementary Table S1. Calculated and measured parameters for sediment core PC-1, including TOC, TN, CaCO<sub>3</sub>, and Si<sub>OPAL</sub> contents, C/N, opal/CaCO<sub>3</sub> ratio, and stable oxygen isotope ratio in tests of the planktic foraminifer *G.bulloides*.

| Core | Depth | Age          | Linear sedimentation rate | Dry bulk density      | Total org. C | Total nitrogen | C/N | Si <sub>OPAL</sub> | CaCO <sub>3</sub> | δ <sup>18</sup> O |
|------|-------|--------------|---------------------------|-----------------------|--------------|----------------|-----|--------------------|-------------------|-------------------|
|      | (cm)  | (cal kyr BP) | (cm kyr <sup>-1</sup> )   | (g cm <sup>-3</sup> ) | (wt %)       | (wt %)         |     | (wt %)             | (wt %)            | (‰ vs PDB)        |
|      | 131   | 12.2         | 26.4                      | 1.0                   | 1.1          | 0.13           | 8.5 | 5.8                | 2.9               |                   |
|      | 133   | 12.3         | 26.4                      | 1.0                   | 1.2          | 0.13           | 8.9 |                    | 2.3               |                   |
|      | 135   | 12.4         | 26.4                      | 1.0                   | 1.1          | 0.13           | 8.7 |                    | 2.4               | 1.1               |
|      | 138   | 12.5         | 26.4                      | 1.0                   | 1.2          | 0.13           | 8.8 |                    | 2.7               |                   |
|      | 140   | 12.6         | 26.4                      | 1.0                   | 1.2          | 0.14           | 8.5 |                    | 2.8               |                   |
|      | 142   | 12.7         | 26.4                      | 0.93                  | 1.3          | 0.15           | 8.5 | 6.3                | 2.9               |                   |
|      | 144   | 12.7         | 26.4                      | 0.95                  | 1.2          | 0.14           | 8.7 |                    | 2.8               | 1.4               |
|      | 146   | 12.8         | 26.4                      | 1.0                   | 1.1          | 0.12           | 9.0 |                    | 3.1               |                   |
|      | 149   | 12.9         | 26.4                      | 1.0                   | 1.1          | 0.12           | 9.0 |                    | 3.4               |                   |
|      | 151   | 13.0         | 26.4                      | 0.68                  | 1.1          | 0.12           | 9.6 |                    | 4.3               |                   |
|      | 152   | 13.0         | 26.4                      | 1.0                   | 1.1          | 0.13           | 8.9 | 6.9                | 3.2               |                   |
|      | 154   | 13.1         | 26.4                      | 0.88                  | 1.2          | 0.14           | 8.7 |                    | 3.3               | 1.2               |
|      | 156   | 13.2         | 26.4                      | 0.94                  | 1.0          | 0.12           | 8.9 |                    | 3.3               |                   |
|      | 159   | 13.3         | 26.4                      | 1.0                   | 1.1          | 0.12           | 8.8 |                    | 3.5               |                   |
|      | 161   | 13.4         | 26.4                      | 1.0                   | 1.0          | 0.12           | 8.7 |                    | 3.5               |                   |
|      | 163   | 13.5         | 26.4                      | 0.93                  | 1.1          | 0.13           | 8.7 | 7.7                | 3.9               | 1.1               |
|      | 165   | 13.5         | 26.4                      | 1.0                   | 1.1          | 0.13           | 8.5 |                    | 3.8               |                   |
|      | 167   | 13.6         | 26.4                      | 0.93                  | 1.1          | 0.13           | 8.7 |                    | 3.5               |                   |
|      | 170   | 13.7         | 26.4                      | 0.90                  | 1.1          | 0.13           | 8.7 |                    | 2.8               |                   |
|      | 172   | 13.8         | 26.4                      | 0.94                  | 1.2          | 0.13           | 9.0 | 9.1                | 2.2               |                   |
|      | 174   | 13.9         | 26.4                      | 0.95                  | 1.1          | 0.12           | 8.8 |                    | 3.0               |                   |
|      | 176   | 14.0         | 26.4                      | 0.95                  | 1.0          | 0.12           | 8.8 |                    | 3.1               |                   |
|      | 178   | 14.0         | 26.4                      | 1.0                   | 1.0          | 0.11           | 8.8 | 7.1                | 2.8               |                   |
|      | 181   | 14.1         | 26.4                      | 0.95                  | 1.1          | 0.13           | 8.4 |                    | 2.8               |                   |
|      | 183   | 14.2         | 26.4                      | 0.93                  | 1.1          | 0.13           | 8.5 |                    | 2.8               |                   |
|      | 185   | 14.3         | 26.4                      | 0.93                  | 1.1          | 0.13           | 8.6 |                    | 3.2               |                   |
|      | 187   | 14.4         | 26.4                      | 0.94                  | 1.1          | 0.13           | 8.7 | 6.2                | 3.5               |                   |
|      | 189   | 14.5         | 26.4                      | 1.0                   | 1.1          | 0.12           | 8.7 |                    | 3.2               | 1.0               |
|      | 192   | 14.5         | 26.4                      | 0.92                  | 1.1          | 0.13           | 8.6 |                    | 3.5               |                   |
|      | 194   | 14.6         | 26.4                      | 0.93                  | 1.1          | 0.13           | 8.6 |                    | 3.9               |                   |
|      | 196   | 14.7         | 26.4                      | 1.0                   | 1.0          | 0.12           | 8.9 |                    | 3.8               |                   |
|      | 198   | 14.8         | 26.4                      | 1.0                   | 1.0          | 0.12           | 8.5 | 5.9                | 4.1               | 1.1               |
|      | 200   | 14.9         | 26.4                      | 1.0                   | 1.0          | 0.12           | 8.6 |                    | 4.1               |                   |
|      | 203   | 15.0         | 26.4                      | 1.0                   | 0.95         | 0.11           | 8.8 |                    | 4.0               |                   |
|      | 205   | 15.0         | 26.4                      | 1.0                   | 1.0          | 0.11           | 8.9 |                    | 3.6               |                   |
|      | 207   | 15.1         | 26.4                      | 1.0                   | 0.87         | 0.11           | 8.1 |                    | 4.0               | 1.4               |
|      | 209   | 15.2         | 26.4                      | 1.0                   | 0.85         | 0.10           | 8.4 | 6.2                | 4.2               |                   |
|      | 211   | 15.3         | 26.4                      | 1.0                   | 0.87         | 0.11           | 8.1 |                    | 4.2               |                   |
|      | 214   | 15.4         | 26.4                      | 0.89                  | 0.85         | 0.10           | 8.2 |                    | 4.6               |                   |
|      | 216   | 15.5         | 26.4                      | 0.95                  | 0.82         | 0.10           | 8.3 |                    | 4.4               | 1.7               |
|      | 218   | 15.5         | 26.4                      | 1.0                   | 0.84         | 0.10           | 8.0 | 7.6                | 4.8               |                   |
|      | 220   | 15.6         | 26.4                      | 0.94                  | 0.84         | 0.10           | 8.2 |                    | 4.4               |                   |
|      | 222   | 15.7         | 26.4                      | 1.0                   | 0.84         | 0.10           | 8.2 |                    | 4.8               |                   |
|      | 225   | 15.8         | 26.4                      | 1.0                   | 0.81         | 0.10           | 8.0 |                    | 4.7               | 1.6               |
|      | 227   | 15.9         | 26.4                      | 1.0                   | 0.82         | 0.10           | 8.0 |                    | 4.8               |                   |
|      | 229   | 16.0         | 26.4                      | 1.0                   | 0.82         | 0.10           | 7.9 | 7.1                | 4.5               |                   |
|      | 231   | 16.0         | 26.4                      | 1.0                   | 0.82         | 0.10           | 8.0 |                    | 4.4               |                   |
|      | 233   | 16.1         | 26.4                      | 0.94                  | 0.81         | 0.10           | 8.1 |                    | 4.5               | 1.7               |
|      | 236   | 16.2         | 26.4                      | 1.0                   | 0.82         | 0.11           | 7.7 |                    | 4.1               |                   |
|      | 238   | 16.3         | 26.4                      | 1.0                   | 0.78         | 0.10           | 7.9 | 6.4                | 4.2               |                   |

Supplementary Table S1. Calculated and measured parameters for sediment core PC-1, including TOC, TN, CaCO<sub>3</sub>, and Si<sub>OPAL</sub> contents, C/N, opal/CaCO<sub>3</sub> ratio, and stable oxygen isotope ratio in tests of the planktic foraminifer *G.bulloides*.

| Core | Depth<br>(cm) | Age<br>(cal kyr BP) | Linear<br>sedimentation<br>rate<br>(cm kyr <sup>-1</sup> ) | Dry bulk<br>density<br>(g cm <sup>-3</sup> ) | Total org.<br>C<br>(wt %) | Total<br>nitrogen<br>(wt %) | C/N  | Si <sub>OPAL</sub><br>(wt %) | CaCO <sub>3</sub><br>(wt %) | δ <sup>18</sup> O<br>(‰ vs PDB) |
|------|---------------|---------------------|------------------------------------------------------------|----------------------------------------------|---------------------------|-----------------------------|------|------------------------------|-----------------------------|---------------------------------|
|      | 240           | 16.4                | 26.4                                                       | 0.93                                         | 0.78                      | 0.09                        | 8.5  |                              | 4.1                         |                                 |
|      | 242           | 16.5                | 26.4                                                       | 0.95                                         | 0.78                      | 0.10                        | 7.8  |                              | 3.7                         | 1.8                             |
|      | 244           | 16.5                | 26.4                                                       | 1.0                                          | 0.71                      | 0.09                        | 7.9  |                              | 3.1                         |                                 |
|      | 247           | 16.6                | 26.4                                                       | 0.89                                         | 0.78                      | 0.10                        | 7.7  |                              | 3.5                         |                                 |
|      | 249           | 16.7                | 26.4                                                       | 1.0                                          | 0.78                      | 0.10                        | 7.9  | 7.2                          | 4.2                         | 1.7                             |
|      | 252           | 16.8                | 26.4                                                       | 1.0                                          | 0.77                      | 0.10                        | 7.6  |                              | 3.9                         | 1.4                             |
|      | 254           | 16.9                | 54.6                                                       | 1.0                                          | 0.85                      | 0.10                        | 8.5  |                              | 3.0                         | 1.8                             |
|      | 256           | 16.9                | 54.6                                                       | 1.0                                          | 0.77                      | 0.10                        | 8.1  |                              | 2.9                         | 1.8                             |
|      | 258           | 16.9                | 54.6                                                       | 0.92                                         | 0.83                      | 0.10                        | 8.7  | 6.6                          | 2.9                         | 1.8                             |
|      | 260           | 17.0                | 54.6                                                       | 1.0                                          | 0.81                      | 0.10                        | 8.5  |                              | 3.0                         | 1.6                             |
|      | 263           | 17.0                | 54.6                                                       | 1.0                                          | 0.80                      | 0.09                        | 8.6  |                              | 2.7                         | 1.6                             |
|      | 265           | 17.1                | 54.6                                                       | 0.92                                         | 0.82                      | 0.10                        | 8.7  |                              | 2.4                         | 1.8                             |
|      | 267           | 17.1                | 54.6                                                       | 0.94                                         | 0.80                      | 0.09                        | 8.8  | 6.7                          | 2.8                         | 1.9                             |
|      | 269           | 17.1                | 54.6                                                       | 1.0                                          | 0.82                      | 0.09                        | 9.2  |                              | 2.5                         | 1.7                             |
|      | 271           | 17.2                | 54.6                                                       | 1.0                                          | 0.81                      | 0.10                        | 8.4  |                              | 3.0                         | 1.9                             |
|      | 274           | 17.2                | 54.6                                                       | 1.0                                          | 1.0                       | 0.10                        | 11   |                              | 1.7                         | 1.6                             |
|      | 276           | 17.3                | 54.6                                                       | 1.0                                          | 0.79                      | 0.09                        | 8.4  |                              | 4.0                         | 1.9                             |
|      | 278           | 17.3                | 54.6                                                       | 1.0                                          | 0.77                      | 0.09                        | 8.7  | 7.9                          | 4.4                         | 1.6                             |
|      | 280           | 17.3                | 54.6                                                       | 1.0                                          | 0.73                      | 0.08                        | 8.7  | 7.4                          | 4.0                         | 2.0                             |
|      | 282           | 17.4                | 54.6                                                       | 1.0                                          | 0.69                      | 0.09                        | 7.8  |                              | 3.9                         | 1.7                             |
|      | 285           | 17.4                | 54.6                                                       | 1.0                                          | 0.83                      | 0.10                        | 8.7  |                              | 4.6                         | 1.9                             |
|      | 287           | 17.5                | 54.6                                                       | 1.0                                          | 0.80                      | 0.09                        | 9.0  |                              | 4.6                         | 2.2                             |
|      | 289           | 17.5                | 54.6                                                       | 0.95                                         | 0.76                      | 0.10                        | 7.9  |                              | 5.3                         | 1.9                             |
|      | 291           | 17.5                | 54.6                                                       | 1.0                                          | 1.0                       | 0.09                        | 11.0 | 8.6                          | 3.2                         | 2.5                             |
|      | 293           | 17.6                | 54.6                                                       | 1.0                                          | 0.87                      | 0.10                        | 9.1  |                              | 6.7                         | 3.5                             |
|      | 296           | 17.6                | 54.6                                                       | 1.0                                          | 0.81                      | 0.10                        | 8.4  |                              | 8.5                         | 3.6                             |
|      | 298           | 17.7                | 54.6                                                       | 0.95                                         | 0.80                      | 0.10                        | 8.2  |                              | 7.5                         | 3.5                             |
|      | 300           | 17.7                | 54.6                                                       | 1.0                                          | 1.2                       | 0.10                        | 12.1 | 7.7                          | 2.8                         | 2.7                             |
|      | 302           | 17.7                | 54.6                                                       | 1.0                                          | 0.88                      | 0.09                        | 9.6  |                              | 2.5                         | 2.2                             |
|      | 304           | 17.8                | 54.6                                                       | 0.91                                         | 0.86                      | 0.10                        | 8.7  |                              | 2.7                         | 1.9                             |
|      | 307           | 17.8                | 54.6                                                       | 0.90                                         | 0.93                      | 0.10                        | 9.2  |                              | 2.2                         | 2.0                             |
|      | 309           | 17.9                | 54.6                                                       | 0.89                                         | 1.0                       | 0.10                        | 10.0 |                              | 2.0                         | 2.2                             |
|      | 311           | 17.9                | 54.6                                                       | 0.93                                         | 0.85                      | 0.10                        | 8.4  | 7.4                          | 4.1                         | 2.3                             |
|      | 313           | 17.9                | 54.6                                                       | 0.91                                         | 0.82                      | 0.10                        | 8.4  |                              | 7.2                         | 3.3                             |
|      | 315           | 18.0                | 54.6                                                       | 0.93                                         | 0.75                      | 0.09                        | 8.4  |                              | 13.8                        | 3.7                             |
|      | 318           | 18.0                | 54.6                                                       | 1.0                                          | 0.79                      | 0.09                        | 8.8  |                              | 9.9                         | 3.4                             |
|      | 320           | 18.1                | 54.6                                                       | 0.92                                         | 0.81                      | 0.09                        | 8.8  |                              | 5.3                         | 3.4                             |
|      | 322           | 18.1                | 54.6                                                       | 0.95                                         | 0.86                      | 0.10                        | 8.7  | 7.0                          | 4.0                         | 2.5                             |
|      | 324           | 18.1                | 220                                                        | 0.95                                         | 0.89                      | 0.10                        | 9.2  |                              | 2.9                         |                                 |
|      | 326           | 18.1                | 220                                                        | 0.94                                         | 0.86                      | 0.10                        | 9.0  |                              | 3.0                         |                                 |
|      | 329           | 18.1                | 220                                                        | 1.0                                          | 0.80                      | 0.09                        | 9.3  |                              | 2.8                         |                                 |
|      | 331           | 18.2                | 220                                                        | 1.0                                          | 0.87                      | 0.09                        | 10   | 7.8                          | 2.3                         | 2.4                             |
|      | 333           | 18.2                | 220                                                        | 0.93                                         | 0.84                      | 0.09                        | 9.1  |                              | 2.6                         |                                 |
|      | 335           | 18.2                | 220                                                        | 1.0                                          | 0.77                      | 0.09                        | 9.0  |                              | 2.9                         |                                 |
|      | 337           | 18.2                | 220                                                        | 0.92                                         | 0.79                      | 0.09                        | 8.7  |                              | 2.8                         |                                 |
|      | 340           | 18.2                | 220                                                        | 1.0                                          | 0.79                      | 0.09                        | 9.3  |                              | 3.1                         | 2.4                             |
|      | 342           | 18.2                | 220                                                        | 0.92                                         | 0.80                      | 0.10                        | 8.3  | 7.9                          | 2.9                         |                                 |
|      | 344           | 18.2                | 220                                                        | 0.87                                         | 0.79                      | 0.09                        | 8.5  |                              | 2.7                         |                                 |
|      | 348           | 18.2                | 220                                                        | 0.91                                         | 0.81                      | 0.10                        | 8.4  | 7.6                          | 3.2                         | 2.4                             |
|      | 353           | 18.3                | 220                                                        | 0.89                                         | 0.84                      | 0.09                        | 9.1  |                              | 3.2                         |                                 |

Supplementary Table S1. Calculated and measured parameters for sediment core PC-1, including TOC, TN, CaCO<sub>3</sub>, and Si<sub>OPAL</sub> contents, C/N, opal/CaCO<sub>3</sub> ratio, and stable oxygen isotope ratio in tests of the planktic foraminifer *G.bulloides*.

| Core | Depth<br>(cm) | Age<br>(cal kyr BP) | Linear<br>sedimentation<br>rate<br>(cm kyr <sup>-1</sup> ) | Dry bulk<br>density<br>(g cm <sup>-3</sup> ) | Total org.<br>C<br>(wt %) | Total<br>nitrogen<br>(wt %) | C/N  | Si <sub>OPAL</sub><br>(wt %) | CaCO <sub>3</sub><br>(wt %) | δ <sup>18</sup> O<br>(‰ vs PDB) |
|------|---------------|---------------------|------------------------------------------------------------|----------------------------------------------|---------------------------|-----------------------------|------|------------------------------|-----------------------------|---------------------------------|
|      | 357           | 18.3                | 220                                                        | 0.93                                         | 0.87                      | 0.09                        | 9.4  |                              | 2.3                         | 2.3                             |
|      | 362           | 18.3                | 220                                                        | 0.92                                         | 0.83                      | 0.10                        | 8.8  | 7.3                          | 3.2                         |                                 |
|      | 366           | 18.3                | 220                                                        | 0.94                                         | 0.77                      | 0.09                        | 8.8  |                              | 3.0                         | 2.5                             |
|      | 370           | 18.4                | 47.7                                                       | 0.94                                         | 0.81                      | 0.09                        | 8.9  | 6.3                          | 3.5                         |                                 |
|      | 375           | 18.5                | 47.7                                                       | 1.0                                          | 0.79                      | 0.09                        | 8.4  |                              | 3.2                         | 2.5                             |
|      | 379           | 18.6                | 47.7                                                       | 0.93                                         | 0.76                      | 0.09                        | 8.6  | 8.4                          | 3.4                         |                                 |
|      | 384           | 18.7                | 47.7                                                       | 1.0                                          | 0.79                      | 0.09                        | 8.5  | 6.8                          | 3.5                         | 2.4                             |
|      | 388           | 18.8                | 47.7                                                       | 1.0                                          | 0.81                      | 0.09                        | 8.6  |                              | 3.6                         |                                 |
|      | 392           | 18.9                | 47.7                                                       | 1.0                                          | 0.90                      | 0.10                        | 9.4  | 6.5                          | 2.4                         | 2.4                             |
|      | 397           | 19.0                | 47.7                                                       | 1.0                                          | 0.78                      | 0.09                        | 8.5  |                              | 4.1                         |                                 |
|      | 401           | 19.0                | 47.7                                                       | 1.0                                          | 0.77                      | 0.09                        | 8.3  | 6.9                          | 3.7                         | 2.4                             |
|      | 406           | 19.1                | 47.7                                                       | 1.0                                          | 0.75                      | 0.09                        | 8.4  |                              | 4.0                         |                                 |
|      | 410           | 19.2                | 47.7                                                       | 1.0                                          | 0.76                      | 0.08                        | 9.0  |                              | 3.9                         | 2.4                             |
|      | 414           | 19.3                | 47.7                                                       | 1.0                                          | 0.82                      | 0.09                        | 9.2  | 7.1                          | 3.4                         |                                 |
|      | 419           | 19.4                | 47.7                                                       | 1.0                                          | 0.71                      | 0.08                        | 8.5  |                              | 3.5                         | 2.5                             |
|      | 423           | 19.5                | 47.7                                                       | 1.0                                          | 0.70                      | 0.08                        | 8.7  | 6.8                          | 3.3                         |                                 |
|      | 428           | 19.6                | 47.7                                                       | 0.91                                         | 0.72                      | 0.08                        | 8.6  |                              | 3.4                         | 2.5                             |
|      | 432           | 19.7                | 47.7                                                       | 0.94                                         | 0.77                      | 0.09                        | 8.5  | 7.1                          | 3.2                         |                                 |
|      | 436           | 19.8                | 47.7                                                       | 1.0                                          | 0.74                      | 0.09                        | 8.7  |                              | 3.7                         | 2.5                             |
|      | 441           | 19.9                | 47.7                                                       | 0.83                                         | 0.70                      | 0.09                        | 8.2  | 6.1                          | 3.9                         |                                 |
|      | 445           | 20.0                | 47.7                                                       | 0.92                                         | 0.76                      | 0.09                        | 8.3  |                              | 3.8                         | 2.4                             |
|      | 450           | 20.1                | 47.7                                                       | 0.93                                         | 0.78                      | 0.10                        | 7.9  |                              | 3.5                         |                                 |
|      | 454           | 20.2                | 47.7                                                       | 0.94                                         | 0.85                      | 0.11                        | 7.9  | 7.0                          | 3.6                         | 2.2                             |
|      | 458           | 20.2                | 47.7                                                       | 1.0                                          | 0.81                      | 0.11                        | 7.7  |                              | 2.7                         |                                 |
|      | 463           | 20.3                | 47.7                                                       | 1.0                                          | 0.83                      | 0.10                        | 8.3  | 6.7                          | 3.1                         | 2.4                             |
|      | 467           | 20.4                | 68.2                                                       | 1.0                                          | 0.81                      | 0.10                        | 8.0  |                              | 3.1                         |                                 |
|      | 472           | 20.5                | 68.2                                                       | 1.0                                          | 0.75                      | 0.10                        | 7.9  | 6.8                          | 3.7                         | 2.4                             |
|      | 476           | 20.5                | 68.2                                                       | 1.0                                          | 0.78                      | 0.10                        | 8.0  |                              | 5.1                         |                                 |
|      | 480           | 20.6                | 68.2                                                       | 0.93                                         | 0.76                      | 0.09                        | 8.5  |                              | 4.2                         | 2.5                             |
|      | 485           | 20.7                | 68.2                                                       | 1.0                                          | 0.76                      | 0.10                        | 7.8  | 6.4                          | 4.7                         |                                 |
|      | 489           | 20.7                | 68.2                                                       | 1.0                                          | 0.74                      | 0.09                        | 8.1  |                              | 3.7                         | 2.4                             |
|      | 494           | 20.8                | 68.2                                                       | 0.93                                         | 0.77                      | 0.10                        | 8.1  | 7.2                          | 4.3                         |                                 |
|      | 498           | 20.9                | 68.2                                                       | 1.0                                          | 0.78                      | 0.10                        | 8.1  |                              | 3.9                         | 2.4                             |
|      | 502           | 20.9                | 68.2                                                       | 1.0                                          | 0.77                      | 0.10                        | 7.7  | 7.0                          | 4.6                         |                                 |
|      | 507           | 21.0                | 68.2                                                       | 1.0                                          | 0.76                      | 0.09                        | 8.3  |                              | 4.3                         | 2.5                             |
|      | 511           | 21.1                | 68.2                                                       | 1.0                                          | 0.71                      | 0.09                        | 8.3  | 7.1                          | 3.7                         |                                 |
|      | 516           | 21.1                | 68.2                                                       | 1.0                                          | 0.74                      | 0.09                        | 8.2  |                              | 4.0                         | 2.4                             |
|      | 520           | 21.2                | 68.2                                                       | 1.0                                          | 0.77                      | 0.09                        | 8.4  |                              | 4.4                         |                                 |
|      | 524           | 21.2                | 68.2                                                       | 1.0                                          | 0.73                      | 0.08                        | 8.7  | 5.9                          | 4.1                         | 2.4                             |
|      | 529           | 21.3                | 68.2                                                       | 0.89                                         | 0.70                      | 0.09                        | 7.8  |                              | 3.4                         |                                 |
|      | 533           | 21.4                | 68.2                                                       | 1.0                                          | 0.73                      | 0.09                        | 8.1  | 7.2                          | 3.6                         | 2.3                             |
|      | 538           | 21.4                | 68.2                                                       | 0.92                                         | 1.0                       | 0.09                        | 11.3 |                              | 1.0                         |                                 |
|      | 542           | 21.5                | 68.2                                                       | 0.89                                         | 0.80                      | 0.10                        | 8.0  | 6.8                          | 3.1                         | 2.3                             |
|      | 546           | 21.6                | 68.2                                                       | 1.0                                          | 0.77                      | 0.10                        | 8.1  |                              | 4.2                         |                                 |
|      | 551           | 21.6                | 68.2                                                       | 1.0                                          | 0.79                      | 0.10                        | 7.9  |                              | 3.9                         | 2.1                             |
|      | 555           | 21.7                | 68.2                                                       | 1.0                                          | 0.78                      | 0.09                        | 9.0  | 7.8                          | 4.3                         |                                 |
|      | 560           | 21.8                | 68.2                                                       | 1.0                                          | 0.79                      | 0.09                        | 8.7  |                              | 3.7                         | 2.3                             |
|      | 564           | 21.8                | 68.2                                                       | 1.0                                          | 0.79                      | 0.09                        | 8.9  | 7.9                          | 2.9                         |                                 |
|      | 568           | 21.9                | 68.2                                                       | 1.0                                          | 0.80                      | 0.09                        | 9.0  |                              | 3.5                         | 2.3                             |
|      | 573           | 22.0                | 68.2                                                       | 1.0                                          | 0.80                      | 0.09                        | 8.9  | 7.1                          | 3.9                         |                                 |

Supplementary Table S1. Calculated and measured parameters for sediment core PC-1, including TOC, TN, CaCO<sub>3</sub>, and Si<sub>OPAL</sub> contents, C/N, opal/CaCO<sub>3</sub> ratio, and stable oxygen isotope ratio in tests of the planktic foraminifer *G.bulloides*.

| Core | Depth | Age          | Linear sedimentation rate | Dry bulk density      | Total org. C | Total nitrogen | C/N | Si <sub>OPAL</sub> | CaCO <sub>3</sub> | δ <sup>18</sup> O |
|------|-------|--------------|---------------------------|-----------------------|--------------|----------------|-----|--------------------|-------------------|-------------------|
|      | (cm)  | (cal kyr BP) | (cm kyr <sup>-1</sup> )   | (g cm <sup>-3</sup> ) | (wt %)       | (wt %)         |     | (wt %)             | (wt %)            | (‰ vs PDB)        |
|      | 577   | 22.0         | 68.2                      | 1.0                   | 0.76         | 0.09           | 8.4 |                    | 3.2               | 2.2               |
|      | 582   | 22.1         | 68.2                      | 1.0                   | 0.82         | 0.09           | 8.8 | 6.8                | 3.2               |                   |
|      | 586   | 22.1         | 68.2                      | 0.95                  | 0.84         | 0.09           | 9.0 |                    | 3.0               | 2.4               |
|      | 590   | 22.2         | 68.2                      | 0.90                  | 0.85         | 0.09           | 9.4 |                    | 2.5               |                   |
|      | 595   | 22.3         | 68.2                      | 1.0                   | 0.82         | 0.10           | 8.3 | 6.4                | 2.5               | 2.2               |
|      | 599   | 22.3         | 68.2                      | 1.0                   | 0.80         | 0.10           | 8.2 |                    | 2.9               |                   |
|      | 604   | 22.4         | 68.2                      | 0.91                  | 0.84         | 0.11           | 7.9 | 7.4                | 3.0               | 2.4               |
|      | 608   | 22.5         | 68.2                      | 1.0                   | 0.84         | 0.10           | 8.3 |                    | 2.3               |                   |
|      | 612   | 22.5         | 68.2                      | 0.93                  | 0.86         | 0.10           | 8.6 | 6.0                | 2.4               | 2.5               |
|      | 617   | 22.6         | 68.2                      | 1.0                   | 0.85         | 0.10           | 8.2 |                    | 2.9               |                   |
|      | 621   | 22.7         | 68.2                      | 1.0                   | 0.81         | 0.10           | 8.5 | 6.8                | 3.1               | 2.4               |
|      | 626   | 22.7         | 68.2                      | 1.0                   | 0.79         | 0.10           | 8.2 |                    | 2.8               |                   |
|      | 630   | 22.8         | 68.2                      | 1.0                   | 0.78         | 0.09           | 8.4 |                    | 3.1               | 2.2               |
|      | 634   | 22.9         | 68.2                      | 0.71                  | 0.82         | 0.10           | 8.4 | 6.7                | 3.0               |                   |

Supplementary Table S2. Calculated and measured parameters for sediment core PC-3, including TOC, TN, and Si<sub>OPAL</sub> contents, and C/N.

| Core | Depth | Age          | Linear sedimentation rate | Dry bulk density      | Total org. C | Total nitrogen | C/N | Si <sub>OPAL</sub> |
|------|-------|--------------|---------------------------|-----------------------|--------------|----------------|-----|--------------------|
|      | (cm)  | (cal kyr BP) | (cm kyr <sup>-1</sup> )   | (g cm <sup>-3</sup> ) | (wt %)       | (wt %)         |     | (wt %)             |
| PC3  | 21.4  | 2.6          | 36.7                      | 0.9                   | 1.6          | 0.20           | 13  | 1.7                |
|      | 23.6  | 2.6          | 36.7                      | 0.95                  | 1.5          | 0.18           | 11  |                    |
|      | 25.9  | 2.7          | 36.7                      | 0.93                  | 1.5          | 0.20           | 11  |                    |
|      | 28.1  | 2.8          | 36.7                      | 1.0                   | 1.4          | 0.17           | 13  |                    |
|      | 30.4  | 2.8          | 36.7                      | 1.0                   | 1.4          | 0.19           | 11  | 1.6                |
|      | 32.6  | 2.9          | 36.7                      | 1.0                   | 1.3          | 0.16           | 9.1 |                    |
|      | 34.9  | 2.9          | 36.7                      | 1.0                   | 1.2          | 0.18           | 8.3 |                    |
|      | 37.1  | 3.0          | 36.7                      | 1.0                   | 1.4          | 0.17           | 12  |                    |
|      | 39.4  | 3.1          | 36.7                      | 0.95                  | 1.3          | 0.16           | 9.6 |                    |
|      | 41.6  | 3.1          | 36.7                      | 0.89                  | 1.4          | 0.17           | 11  | 1.6                |
|      | 43.9  | 3.2          | 36.7                      | 0.91                  | 1.4          | 0.18           | 9.2 |                    |
|      | 46.1  | 3.3          | 36.7                      | 1.0                   | 1.4          | 0.18           | 10  |                    |
|      | 48.4  | 3.3          | 36.7                      | 1.0                   | 1.3          | 0.16           | 11  |                    |
|      | 50.6  | 3.4          | 36.7                      | 1.0                   | 1.3          | 0.17           | 11  | 1.2                |
|      | 52.9  | 3.4          | 36.7                      | 1.0                   | 1.3          | 0.16           | 13  |                    |
|      | 55.1  | 3.5          | 36.7                      | 0.94                  | 1.3          | 0.16           | 13  |                    |
|      | 57.4  | 3.6          | 36.7                      | 1.0                   | 1.2          | 0.16           | 13  |                    |
|      | 59.6  | 3.6          | 36.7                      | 1.0                   | 1.3          | 0.16           | 12  |                    |
|      | 61.9  | 3.7          | 36.7                      | 1.0                   | 1.2          | 0.16           | 13  | 1.4                |
|      | 64.1  | 3.7          | 36.7                      | 0.93                  | 1.3          | 0.17           | 11  |                    |
|      | 66.4  | 3.8          | 36.7                      | 1.0                   | 1.3          | 0.16           | 11  |                    |
|      | 68.6  | 3.9          | 36.7                      | 1.0                   | 1.3          | 0.17           | 10  |                    |
|      | 70.9  | 3.9          | 36.7                      | 1.0                   | 1.3          | 0.18           | 9.7 | 1.7                |
|      | 73.1  | 4.0          | 36.7                      | —                     | —            | —              | —   | 1.8                |
|      | 75.4  | 4.0          | 36.7                      | —                     | —            | —              | —   |                    |
|      | 76.0  | 4.1          | 36.7                      | 1.0                   | 1.4          | 0.17           | 8.7 |                    |
|      | 78.2  | 4.1          | 36.7                      | 0.92                  | 1.4          | 0.18           | 9.8 |                    |
|      | 80.5  | 4.2          | 36.7                      | 0.95                  | 1.5          | 0.18           | 9.4 |                    |
|      | 82.7  | 4.2          | 36.7                      | 1.0                   | 1.4          | 0.17           | 12  | 2.2                |
|      | 85.0  | 4.3          | 36.7                      | 1.0                   | 1.4          | 0.18           | 9.2 |                    |
|      | 87.2  | 4.4          | 36.7                      | 1.0                   | 1.4          | 0.18           | 12  |                    |
|      | 89.5  | 4.4          | 36.7                      | 1.0                   | 1.3          | 0.17           | 12  |                    |
|      | 91.7  | 4.5          | 36.7                      | 0.95                  | 1.4          | 0.18           | 11  |                    |
|      | 94.0  | 4.6          | 36.7                      | 1.0                   | 1.4          | 0.18           | 10  |                    |
|      | 96.2  | 4.6          | 41.9                      | 0.92                  | 1.4          | 0.19           | 9.8 | 2.1                |
|      | 98.5  | 4.7          | 41.9                      | 1.0                   | 1.4          | 0.18           | 14  |                    |
|      | 101   | 4.7          | 41.9                      | 1.0                   | 1.4          | 0.18           | 9.6 |                    |
|      | 103   | 4.8          | 41.9                      | 0.94                  | 1.4          | 0.19           | 11  | 1.9                |
|      | 105   | 4.8          | 41.9                      | 0.89                  | 1.5          | 0.19           | 11  |                    |
|      | 107   | 4.9          | 41.9                      | 1.0                   | 1.5          | 0.19           | 10  |                    |
|      | 110   | 4.9          | 41.9                      | 1.0                   | 1.4          | 0.17           | 13  |                    |
|      | 112   | 5.0          | 41.9                      | 1.0                   | 1.3          | 0.18           | 9.6 | 1.6                |
|      | 114   | 5.0          | 41.9                      | 0.95                  | 1.4          | 0.17           | 9.9 |                    |
|      | 116   | 5.1          | 41.9                      | 1.0                   | 1.3          | 0.17           | 13  |                    |
|      | 119   | 5.2          | 41.9                      | 1.0                   | 1.3          | 0.18           | 12  |                    |
|      | 121   | 5.2          | 41.9                      | 1.0                   | 1.3          | 0.17           | 8.6 | 1.8                |
|      | 123   | 5.3          | 41.9                      | 1.0                   | 1.2          | 0.17           | 10  |                    |
|      | 125   | 5.3          | 41.9                      | 1.1                   | 1.1          | 0.16           | 11  |                    |
|      | 128   | 5.4          | 41.9                      | 1.0                   | 1.2          | 0.15           | 15  |                    |
|      | 130   | 5.4          | 41.9                      | 1.0                   | 1.2          | 0.17           | 14  |                    |
|      | 132   | 5.5          | 41.9                      | 1.0                   | 1.2          | 0.14           | 13  | 1.8                |
|      | 134   | 5.5          | 41.9                      | 1.0                   | 1.2          | 0.15           | 13  |                    |
|      | 137   | 5.6          | 41.9                      | 1.0                   | 1.2          | 0.14           | 13  |                    |
|      | 139   | 5.6          | 41.9                      | 1.1                   | 1.3          | 0.15           | 13  |                    |



Supplementary Table S2. Calculated and measured parameters for sediment core PC-3, including TOC, TN, and Si<sub>OPAL</sub> contents, and C/N.

| Core | Depth | Age          | Linear<br>sedimentation<br>rate | Dry bulk<br>density   | Total org.<br>C | Total<br>nitrogen | C/N | Si <sub>OPAL</sub> |
|------|-------|--------------|---------------------------------|-----------------------|-----------------|-------------------|-----|--------------------|
|      | (cm)  | (cal kyr BP) | (cm kyr <sup>-1</sup> )         | (g cm <sup>-3</sup> ) | (wt %)          | (wt %)            |     | (wt %)             |
|      | 141   | 5.7          | 41.9                            | 1.0                   | 1.4             | 0.17              | 16  | 1.8                |
|      | 143   | 5.7          | 36.9                            | 1.0                   | 1.1             | 0.12              | 15  |                    |
|      | 146   | 5.8          | 36.9                            | 1.0                   | 1.2             | 0.14              | 14  |                    |
|      | 148   | 5.9          | 36.9                            | 1.1                   | 1.1             | 0.13              | 13  |                    |
|      | 150   | 5.9          | 36.9                            | 1.1                   | 1.2             | 0.14              | 17  |                    |
|      | 152   | 6.0          | 36.9                            | 1.1                   | 1.1             | 0.14              | 14  | 1.4                |
|      | 155   | 6.1          | 36.9                            | 1.2                   | 1.1             | 0.14              | 10  |                    |
|      | 157   | 6.1          | 36.9                            | 1.0                   | 1.2             | 0.15              | 12  |                    |
|      | 159   | 6.2          | 36.9                            | 1.0                   | 1.2             | 0.15              | 14  |                    |
|      | 161   | 6.2          | 36.9                            | 1.0                   | 1.2             | 0.16              | 13  | 1.7                |
|      | 164   | 6.3          | 36.9                            | 1.0                   | 1.2             | 0.15              | 13  |                    |
|      | 166   | 6.4          | 36.9                            | 1.1                   | 1.2             | 0.14              | 14  |                    |
|      | 168   | 6.4          | 36.9                            | 1.0                   | 1.3             | 0.16              | 10  |                    |
|      | 170   | 6.5          | 36.9                            | 1.0                   | 1.4             | 0.18              | 13  |                    |
|      | 173   | 6.5          | 36.9                            | 1.1                   | 1.2             | 0.15              | 12  | 1.8                |
|      | 175   | 6.6          | 36.9                            | 1.0                   | 1.4             | 0.17              | 11  |                    |
|      | 177   | 6.7          | 36.9                            | 1.1                   | 1.3             | 0.15              | 11  |                    |
|      | 178   | 6.7          | 36.9                            | 1.1                   | 1.2             | 0.14              | 11  | 1.9                |
|      | 180   | 6.7          | 36.9                            | 1.1                   | 1.2             | 0.14              | 9.8 |                    |
|      | 182   | 6.8          | 36.9                            | 1.1                   | 1.1             | 0.12              | 11  |                    |
|      | 185   | 6.9          | 36.9                            | 1.1                   | 1.1             | 0.12              | 15  |                    |
|      | 187   | 6.9          | 36.9                            | 1.1                   | 1.2             | 0.13              | 15  | 1.5                |
|      | 189   | 7.0          | 36.9                            | 1.1                   | 1.3             | 0.14              | 11  |                    |
|      | 191   | 7.0          | 36.9                            | 1.2                   | 1.2             | 0.14              | 10  |                    |
|      | 194   | 7.1          | 36.9                            | 1.1                   | 1.0             | 0.15              | 11  |                    |
|      | 196   | 7.2          | 36.9                            | 1.1                   | 1.1             | 0.14              | 9.0 |                    |
|      | 198   | 7.2          | 36.9                            | 1.1                   | 1.2             | 0.15              | 11  | 2.2                |
|      | 200   | 7.3          | 36.9                            | 1.1                   | 1.2             | 0.14              | 11  |                    |
|      | 203   | 7.4          | 36.9                            | 1.1                   | 1.2             | 0.14              | 12  |                    |
|      | 205   | 7.4          | 36.9                            | 1.1                   | 1.1             | 0.13              | 11  |                    |
|      | 207   | 7.5          | 60.0                            | 1.1                   | 1.1             | 0.13              | 16  | 2.0                |
|      | 209   | 7.5          | 60.0                            | 1.0                   | 1.1             | 0.12              | 11  |                    |
|      | 212   | 7.5          | 60.0                            | 1.1                   | 1.1             | 0.12              | 15  |                    |
|      | 214   | 7.6          | 60.0                            | 1.1                   | 1.0             | 0.12              | 15  |                    |
|      | 216   | 7.6          | 60.0                            | 1.1                   | 1.1             | 0.12              | 14  |                    |
|      | 218   | 7.7          | 60.0                            | 1.1                   | 1.0             | 0.11              | 9.6 | 1.8                |
|      | 221   | 7.7          | 60.0                            | 1.1                   | 1.1             | 0.12              | 11  |                    |
|      | 223   | 7.7          | 60.0                            | 1.2                   | 1.0             | 0.11              | 13  |                    |
|      | 225   | 7.8          | 60.0                            | 1.2                   | 1.1             | 0.12              | 12  |                    |
|      | 227   | 7.8          | 60.0                            | 1.1                   | 1.0             | 0.11              | 13  | 2.0                |
|      | 230   | 7.8          | 60.0                            | 1.1                   | 1.0             | 0.13              | 11  |                    |
|      | 232   | 7.9          | 60.0                            | 1.1                   | 1.0             | 0.11              | 18  |                    |
|      | 234   | 7.9          | 60.0                            | 1.2                   | 1.0             | 0.11              | 14  |                    |
|      | 236   | 8.0          | 60.0                            | 1.1                   | 0.91            | 0.09              | 16  |                    |
|      | 239   | 8.0          | 60.0                            | 1.1                   | 1.0             | 0.11              | 14  | 2.2                |
|      | 241   | 8.0          | 60.0                            | 1.1                   | 0.94            | 0.11              | 10  |                    |
|      | 243   | 8.1          | 60.0                            | 1.1                   | 0.91            | 0.11              | 17  |                    |
|      | 245   | 8.1          | 60.0                            | 1.1                   | 0.89            | 0.11              | 15  |                    |
|      | 248   | 8.1          | 60.0                            | 1.1                   | 1.0             | 0.11              | 13  | 1.8                |
|      | 250   | 8.2          | 60.0                            | 1.2                   | 0.93            | 0.10              | 17  |                    |
|      | 252   | 8.2          | 60.0                            | 1.3                   | 0.90            | 0.14              | 7.9 |                    |
|      | 254   | 8.3          | 60.0                            | 1.2                   | 0.83            | 0.092             | 18  |                    |
|      | 257   | 8.3          | 60.0                            | 1.5                   | 0.78            | 0.089             | 10  |                    |
|      | 259   | 8.3          | 60.0                            | 1.4                   | 0.69            | 0.076             | 15  | 2.7                |

Supplementary Table S2. Calculated and measured parameters for sediment core PC-3, including TOC, TN, and Si<sub>OPAL</sub> contents, and C/N.

| Core | Depth | Age          | Linear<br>sedimentation<br>rate | Dry bulk<br>density   | Total org.<br>C | Total<br>nitrogen | C/N | Si <sub>OPAL</sub> |
|------|-------|--------------|---------------------------------|-----------------------|-----------------|-------------------|-----|--------------------|
|      | (cm)  | (cal kyr BP) | (cm kyr <sup>-1</sup> )         | (g cm <sup>-3</sup> ) | (wt %)          | (wt %)            |     | (wt %)             |
|      | 261   | 8.4          | 60.0                            | 1.5                   | 0.51            | 0.054             | 10  |                    |
|      | 263   | 8.4          | 60.0                            | 1.2                   | 0.55            | 0.059             | 14  |                    |
|      | 266   | 8.4          | 60.0                            | 1.4                   | 0.48            | 0.040             | 21  |                    |
|      | 268   | 8.5          | 60.0                            | 1.4                   | 0.48            | 0.041             | 20  | 1.4                |
|      | 270   | 8.5          | 60.0                            | 1.4                   | 0.47            | 0.051             | 14  |                    |
|      | 272   | 8.6          | 60.0                            | 1.4                   | 0.54            | 0.064             | 8.8 | 1.3                |
|      | 275   | 8.6          | 60.0                            | 1.4                   | 0.51            | 0.052             | 15  |                    |
|      | 277   | 8.6          | 60.0                            | 1.4                   | 0.52            | 0.054             | 11  | 1.2                |
|      | 279   | 8.7          | 60.0                            | —                     | —               | —                 | —   |                    |
|      | 280   | 8.7          | 60.0                            | 1.4                   | 0.56            | 0.07              | 11  | 1.2                |
|      | 282   | 8.7          | 60.0                            | 1.4                   | 0.55            | 0.07              | 12  |                    |
|      | 285   | 8.8          | 60.0                            | 1.5                   | 0.55            | 0.08              | 9.3 |                    |
|      | 287   | 8.8          | 60.0                            | 1.5                   | 0.43            | 0.043             | 16  |                    |
|      | 289   | 8.8          | 60.0                            | 1.5                   | 0.55            | 0.043             | 11  |                    |
|      | 291   | 8.9          | 60.0                            | 1.4                   | 0.55            | 0.08              | 9   | 1.2                |
|      | 294   | 8.9          | 60.0                            | 1.4                   | 0.58            | 0.08              | 10  |                    |
|      | 296   | 9.0          | 60.0                            | 1.4                   | 0.57            | 0.07              | 11  |                    |
|      | 298   | 9.0          | 60.0                            | 1.4                   | 0.55            | 0.07              | 16  |                    |
|      | 300   | 9.0          | 60.0                            | 1.4                   | 0.52            | 0.07              | 11  | 1.5                |
|      | 303   | 9.1          | 147                             | 1.5                   | 0.49            | 0.05              | 16  |                    |
|      | 305   | 9.1          | 147                             | 1.4                   | 0.52            | 0.06              | 16  |                    |
|      | 307   | 9.1          | 147                             | 1.5                   | 0.51            | 0.06              | 15  |                    |
|      | 309   | 9.1          | 147                             | 1.5                   | 0.50            | 0.06              | 10  |                    |
|      | 312   | 9.1          | 147                             | 1.4                   | 0.53            | 0.05              | 11  | 1.5                |
|      | 314   | 9.1          | 147                             | 1.5                   | 0.46            | 0.043             | 15  |                    |
|      | 316   | 9.2          | 147                             | 1.4                   | 0.50            | 0.06              | 14  |                    |
|      | 318   | 9.2          | 147                             | 1.4                   | 0.50            | 0.05              | 19  |                    |
|      | 321   | 9.2          | 147                             | 1.4                   | 0.43            | 0.05              | 17  | 1.7                |
|      | 323   | 9.2          | 147                             | 1.4                   | 0.55            | 0.06              | 16  |                    |
|      | 325   | 9.2          | 147                             | 1.4                   | 0.60            | 0.07              | 10  |                    |
|      | 327   | 9.2          | 147                             | 1.4                   | 0.56            | 0.06              | 14  |                    |
|      | 330   | 9.3          | 147                             | 1.4                   | 0.53            | 0.06              | 10  |                    |
|      | 332   | 9.3          | 147                             | 1.4                   | 0.58            | 0.08              | 7.9 | 1.4                |
|      | 334   | 9.3          | 147                             | 1.4                   | 0.53            | 0.05              | 13  |                    |
|      | 336   | 9.3          | 147                             | 1.5                   | 0.53            | 0.06              | 16  |                    |
|      | 339   | 9.3          | 147                             | 1.4                   | 0.65            | 0.07              | 11  |                    |
|      | 341   | 9.3          | 147                             | 1.4                   | 0.61            | 0.06              | 12  | 1.7                |
|      | 343   | 9.3          | 147                             | 1.4                   | 0.53            | 0.05              | 14  |                    |
|      | 345   | 9.4          | 147                             | 1.4                   | 0.55            | 0.05              | 16  |                    |
|      | 348   | 9.4          | 147                             | 1.4                   | 0.54            | 0.047             | 13  |                    |
|      | 350   | 9.4          | 147                             | 1.4                   | 0.56            | 0.053             | 12  | 1.4                |
|      | 352   | 9.4          | 147                             | 1.4                   | 0.52            | 0.046             | 22  |                    |
|      | 354   | 9.4          | 147                             | 1.4                   | 0.53            | 0.060             | 14  |                    |
|      | 357   | 9.4          | 147                             | 1.3                   | 0.61            | 0.063             | 14  |                    |
|      | 359   | 9.4          | 147                             | 1.4                   | 0.53            | 0.056             | 16  |                    |
|      | 361   | 9.5          | 147                             | 1.3                   | 0.68            | 0.059             | 14  | 1.3                |
|      | 363   | 9.5          | 147                             | 1.3                   | 0.73            | 0.075             | 13  |                    |
|      | 366   | 9.5          | 147                             | 1.2                   | 0.79            | 0.077             | 17  |                    |
|      | 368   | 9.5          | 147                             | 1.3                   | 0.69            | 0.070             | 14  |                    |
|      | 370   | 9.5          | 147                             | 1.3                   | 0.78            | 0.085             | 16  | 1.5                |
|      | 372   | 9.5          | 147                             | 1.3                   | 0.75            | 0.085             | 11  |                    |
|      | 375   | 9.6          | 147                             | 1.3                   | 0.59            | 0.069             | 17  |                    |
|      | 377   | 9.6          | 147                             | 1.2                   | 0.72            | 0.083             | 13  |                    |
|      | 379   | 9.6          | 147                             | 1.2                   | 0.84            | 0.10              | 11  | 1.7                |

Supplementary Table S2. Calculated and measured parameters for sediment core PC-3, including TOC, TN, and Si<sub>OPAL</sub> contents, and C/N.

| Core | Depth | Age          | Linear<br>sedimentation<br>rate | Dry bulk<br>density   | Total org.<br>C | Total<br>nitrogen | C/N | Si <sub>OPAL</sub> |
|------|-------|--------------|---------------------------------|-----------------------|-----------------|-------------------|-----|--------------------|
|      | (cm)  | (cal kyr BP) | (cm kyr <sup>-1</sup> )         | (g cm <sup>-3</sup> ) | (wt %)          | (wt %)            |     | (wt %)             |
|      | 380   | 9.6          | 147                             | 1.3                   | 0.74            | 0.085             | 16  |                    |
|      | 383   | 9.6          | 147                             | 1.2                   | 0.78            | 0.093             | 12  | 1.7                |
|      | 385   | 9.6          | 147                             | 1.2                   | 0.75            | 0.080             | 19  |                    |
|      | 387   | 9.6          | 147                             | 1.2                   | 0.77            | 0.082             | 10  |                    |
|      | 389   | 9.7          | 147                             | 1.3                   | 0.67            | 0.076             | 17  |                    |
|      | 392   | 9.7          | 147                             | 1.3                   | 0.66            | 0.073             | 12  |                    |
|      | 394   | 9.7          | 147                             | 1.3                   | 0.59            | 0.067             | 15  | 2.0                |
|      | 396   | 9.7          | 147                             | 1.3                   | 0.66            | 0.075             | 10  |                    |
|      | 398   | 9.7          | 147                             | 1.3                   | 0.72            | 0.076             | 11  |                    |
|      | 401   | 9.7          | 147                             | 1.2                   | 0.86            | 0.087             | 12  |                    |
|      | 403   | 9.8          | 166                             | 1.2                   | 0.81            | 0.086             | 14  | 1.9                |
|      | 405   | 9.8          | 166                             | 1.3                   | 0.75            | 0.078             | 11  |                    |
|      | 407   | 9.8          | 166                             | 1.3                   | 0.66            | 0.066             | 13  |                    |
|      | 410   | 9.8          | 166                             | 1.3                   | 0.59            | 0.062             | 19  |                    |
|      | 412   | 9.8          | 166                             | 1.3                   | 0.69            | 0.070             | 12  | 1.7                |
|      | 414   | 9.8          | 166                             | 1.4                   | 0.68            | 0.071             | 12  |                    |
|      | 416   | 9.8          | 166                             | 1.3                   | 0.76            | 0.081             | 11  |                    |
|      | 419   | 9.8          | 166                             | 1.3                   | 0.57            | 0.062             | 18  |                    |
|      | 421   | 9.9          | 166                             | 1.3                   | 0.73            | 0.079             | 13  |                    |
|      | 423   | 9.9          | 166                             | 1.3                   | 0.60            | 0.066             | 13  | 2.5                |
|      | 425   | 9.9          | 166                             | 1.3                   | 0.68            | 0.077             | 16  |                    |
|      | 428   | 9.9          | 166                             | 1.3                   | 0.61            | 0.069             | 15  |                    |
|      | 430   | 9.9          | 166                             | 1.4                   | 0.60            | 0.068             | 15  |                    |
|      | 432   | 9.9          | 166                             | 1.3                   | 0.72            | 0.078             | 12  | 2.2                |
|      | 434   | 9.9          | 166                             | 1.3                   | 0.66            | 0.067             | 11  |                    |
|      | 437   | 10.0         | 166                             | 1.4                   | 0.64            | 0.070             | 16  |                    |
|      | 439   | 10.0         | 166                             | 1.3                   | 0.62            | 0.069             | 11  |                    |
|      | 441   | 10.0         | 166                             | 1.3                   | 0.66            | 0.077             | 11  |                    |
|      | 443   | 10.0         | 166                             | 1.3                   | 0.70            | 0.086             | 14  | 1.6                |
|      | 446   | 10.0         | 166                             | 1.2                   | 0.68            | 0.077             | 13  |                    |
|      | 448   | 10.0         | 166                             | 1.3                   | 0.74            | 0.081             | 14  |                    |
|      | 450   | 10.0         | 166                             | 1.3                   | 0.71            | 0.079             | 12  |                    |
|      | 452   | 10.0         | 166                             | 1.3                   | 0.69            | 0.078             | 9.5 | 2.1                |
|      | 455   | 10.1         | 166                             | 1.2                   | 0.69            | 0.076             | 10  |                    |
|      | 457   | 10.1         | 166                             | 1.3                   | 0.69            | 0.10              | 7.5 |                    |
|      | 459   | 10.1         | 166                             | 1.3                   | 0.65            | 0.089             | 11  |                    |
|      | 461   | 10.1         | 166                             | 1.3                   | 0.69            | 0.088             | 11  |                    |
|      | 464   | 10.1         | 166                             | 1.3                   | 0.75            | 0.10              | 10  | 1.7                |
|      | 466   | 10.1         | 166                             | 1.3                   | 0.67            | 0.082             | 12  |                    |
|      | 468   | 10.1         | 166                             | 1.3                   | 0.62            | 0.074             | 11  |                    |
|      | 470   | 10.2         | 166                             | 1.3                   | 0.67            | 0.080             | 10  |                    |
|      | 473   | 10.2         | 166                             | 1.4                   | 0.64            | 0.076             | 12  | 2.1                |
|      | 475   | 10.2         | 166                             | 1.4                   | 0.65            | 0.077             | 13  |                    |
|      | 477   | 10.2         | 166                             | 1.4                   | 0.61            | 0.069             | 13  |                    |
|      | 479   | 10.2         | 166                             | 1.5                   | 0.70            | 0.081             | 16  |                    |
|      | 482   | 10.2         | 166                             | 1.4                   | 0.67            | 0.081             | 15  |                    |
|      | 484   | 10.2         | 166                             | 1.4                   | 0.67            | 0.082             | 10  | 1.8                |
|      | 486   | 10.3         | 166                             | 1.3                   | 0.72            | 0.090             | 9.4 |                    |
|      | 488   | 10.3         | 166                             | 1.3                   | 0.70            | 0.087             | 11  |                    |
|      | 491   | 10.3         | 166                             | 1.4                   | 0.72            | 0.087             | 10  |                    |
|      | 493   | 10.3         | 166                             | 1.3                   | 0.61            | 0.075             | 15  | 2.0                |
|      | 495   | 10.3         | 166                             | 1.4                   | 0.65            | 0.080             | 13  |                    |
|      | 497   | 10.3         | 166                             | 1.3                   | 0.64            | 0.081             | 11  |                    |
|      | 500   | 10.3         | 166                             | 1.3                   | 0.64            | 0.079             | 13  |                    |

Supplementary Table S2. Calculated and measured parameters for sediment core PC-3, including TOC, TN, and Si<sub>OPAL</sub> contents, and C/N.

| Core | Depth | Age          | Linear<br>sedimentation<br>rate | Dry bulk<br>density   | Total org.<br>C | Total<br>nitrogen | C/N | Si <sub>OPAL</sub> |
|------|-------|--------------|---------------------------------|-----------------------|-----------------|-------------------|-----|--------------------|
|      | (cm)  | (cal kyr BP) | (cm kyr <sup>-1</sup> )         | (g cm <sup>-3</sup> ) | (wt %)          | (wt %)            |     | (wt %)             |
|      | 502   | 10.3         | 166                             | 1.4                   | 0.56            | 0.067             | 10  | 2.0                |
|      | 504   | 10.4         | 166                             | 1.4                   | 0.63            | 0.078             | 9.3 |                    |
|      | 506   | 10.4         | 166                             | 1.3                   | 0.65            | 0.075             | 11  |                    |
|      | 509   | 10.4         | 166                             | 1.3                   | 0.66            | 0.083             | 14  |                    |
|      | 511   | 10.4         | 166                             | 1.4                   | 0.69            | 0.086             | 12  |                    |
|      | 513   | 10.4         | 166                             | 1.4                   | 0.56            | 0.076             | 8.5 | 2.1                |
|      | 515   | 10.4         | 166                             | 1.4                   | 0.46            | 0.062             | 8.0 |                    |
|      | 518   | 10.4         | 166                             | 1.6                   | 0.14            | 0.024             | 11  |                    |
|      | 520   | 10.5         | 166                             | 1.6                   | 0.15            | 0.022             | 14  |                    |
|      | 522   | 10.5         | 166                             | 1.4                   | 0.52            | 0.063             | 14  | 1.4                |
|      | 524   | 10.5         | 166                             | 1.3                   | 0.68            | 0.083             | 16  |                    |
|      | 527   | 10.5         | 166                             | 1.3                   | 0.68            | 0.078             | 9.2 |                    |
|      | 529   | 10.5         | 166                             | 1.3                   | 0.69            | 0.083             | 11  |                    |
|      | 531   | 10.5         | 166                             | 1.3                   | 0.58            | 0.067             | 11  |                    |
|      | 533   | 10.5         | 166                             | 1.3                   | 0.68            | 0.071             | 20  | 1.7                |
|      | 536   | 10.6         | 166                             | 1.3                   | 0.63            | 0.072             | 11  |                    |
|      | 538   | 10.6         | 166                             | 1.3                   | 0.67            | 0.078             | 12  |                    |
|      | 540   | 10.6         | 166                             | 1.3                   | 0.67            | 0.079             | 11  |                    |
|      | 542   | 10.6         | 166                             | 1.3                   | 0.68            | 0.080             | 11  | 2.5                |
|      | 545   | 10.6         | 166                             | 1.3                   | 0.69            | 0.080             | 13  |                    |
|      | 547   | 10.6         | 166                             | 1.3                   | 0.67            | 0.078             | 15  |                    |
|      | 549   | 10.6         | 166                             | 1.3                   | 0.68            | 0.081             | 9.7 |                    |
|      | 551   | 10.6         | 166                             | 1.3                   | 0.58            | 0.070             | 10  |                    |
|      | 554   | 10.7         | 166                             | 1.4                   | 0.48            | 0.058             | 15  | 2.0                |
|      | 556   | 10.7         | 166                             | 1.3                   | 0.63            | 0.077             | 13  |                    |
|      | 558   | 10.7         | 166                             | 1.4                   | 0.63            | 0.073             | 13  |                    |
|      | 560   | 10.7         | 166                             | 1.3                   | 0.87            | 0.094             | 17  |                    |
|      | 563   | 10.7         | 166                             | 1.3                   | 0.75            | 0.085             | 14  | 2.1                |
|      | 565   | 10.7         | 166                             | 1.3                   | 0.72            | 0.072             | 14  |                    |
|      | 567   | 10.7         | 166                             | 1.3                   | 0.74            | 0.077             | 11  |                    |
|      | 569   | 10.8         | 166                             | 1.2                   | 0.81            | 0.084             | 10  |                    |
|      | 572   | 10.8         | 166                             | 1.3                   | 0.76            | 0.078             | 12  |                    |
|      | 574   | 10.8         | 166                             | 1.3                   | 0.85            | 0.080             | 12  | 2.2                |
|      | 576   | 10.8         | 166                             | 1.3                   | 0.78            | 0.077             | 13  |                    |
|      | 578   | 10.8         | 166                             | —                     | —               | —                 | —   |                    |
|      | 580   | 10.8         | 166                             | 1.3                   | 0.75            | 0.080             | 11  |                    |
|      | 582   | 10.8         | 166                             | 1.5                   | 0.70            | 0.083             | 12  | 2.4                |
|      | 584   | 10.8         | 166                             | 1.3                   | 0.73            | 0.083             | 13  |                    |
|      | 586   | 10.9         | 166                             | 1.3                   | 0.73            | 0.081             | 15  |                    |
|      | 589   | 10.9         | 166                             | 1.3                   | 0.77            | 0.084             | 10  |                    |
|      | 591   | 10.9         | 166                             | 1.3                   | 0.75            | 0.080             | 11  |                    |
|      | 593   | 10.9         | 166                             | 1.3                   | 0.74            | 0.080             | 10  | 2.5                |
|      | 595   | 10.9         | 166                             | 1.3                   | 0.77            | 0.086             | 13  |                    |
|      | 598   | 10.9         | 166                             | 1.3                   | 0.64            | 0.069             | 17  |                    |
|      | 600   | 10.9         | 166                             | 1.3                   | 0.65            | 0.074             | 17  |                    |
|      | 602   | 11.0         | 182                             | 1.3                   | 0.66            | 0.072             | 16  | 1.8                |
|      | 604   | 11.0         | 182                             | 1.3                   | 0.74            | 0.084             | 12  |                    |
|      | 607   | 11.0         | 182                             | 1.3                   | 0.68            | 0.076             | 14  |                    |
|      | 609   | 11.0         | 182                             | 1.3                   | 0.68            | 0.077             | 12  |                    |
|      | 611   | 11.0         | 182                             | 1.3                   | 0.70            | 0.076             | 13  |                    |
|      | 613   | 11.0         | 182                             | 1.3                   | 0.75            | 0.080             | 10  | 2.2                |
|      | 616   | 11.0         | 182                             | 1.2                   | 0.78            | 0.087             | 10  |                    |
|      | 618   | 11.0         | 182                             | 1.3                   | 0.75            | 0.081             | 11  |                    |
|      | 620   | 11.1         | 182                             | 1.2                   | 0.82            | 0.090             | 12  |                    |

Supplementary Table S2. Calculated and measured parameters for sediment core PC-3, including TOC, TN, and Si<sub>OPAL</sub> contents, and C/N.

| Core | Depth | Age          | Linear<br>sedimentation<br>rate | Dry bulk<br>density   | Total org.<br>C | Total<br>nitrogen | C/N | Si <sub>OPAL</sub> |
|------|-------|--------------|---------------------------------|-----------------------|-----------------|-------------------|-----|--------------------|
|      | (cm)  | (cal kyr BP) | (cm kyr <sup>-1</sup> )         | (g cm <sup>-3</sup> ) | (wt %)          | (wt %)            |     | (wt %)             |
|      | 622   | 11.1         | 182                             | 1.3                   | 0.79            | 0.091             | 13  | 2.5                |
|      | 625   | 11.1         | 182                             | 1.3                   | 0.76            | 0.085             | 14  |                    |
|      | 627   | 11.1         | 182                             | 1.3                   | 0.66            | 0.077             | 13  |                    |
|      | 629   | 11.1         | 182                             | 1.3                   | 0.66            | 0.076             | 11  |                    |
|      | 631   | 11.1         | 182                             | 1.3                   | 0.71            | 0.082             | 13  |                    |
|      | 634   | 11.1         | 182                             | 1.3                   | 0.66            | 0.077             | 13  | 2.1                |
|      | 636   | 11.1         | 182                             | 1.3                   | 0.68            | 0.075             | 9.9 |                    |
|      | 638   | 11.2         | 182                             | 1.3                   | 0.70            | 0.080             | 15  |                    |
|      | 640   | 11.2         | 182                             | 1.3                   | 0.72            | 0.085             | 12  |                    |
|      | 643   | 11.2         | 182                             | 1.3                   | 0.77            | 0.090             | 12  | 2.7                |
|      | 645   | 11.2         | 182                             | 1.3                   | 0.69            | 0.079             | 14  |                    |
|      | 647   | 11.2         | 182                             | 1.3                   | 0.69            | 0.082             | 13  |                    |
|      | 649   | 11.2         | 182                             | 1.3                   | 0.67            | 0.081             | 16  |                    |
|      | 652   | 11.2         | 182                             | 1.3                   | 0.67            | 0.078             | 10  |                    |
|      | 654   | 11.2         | 182                             | 1.3                   | 0.67            | 0.080             | 12  | 2.4                |
|      | 656   | 11.3         | 182                             | 1.3                   | 0.66            | 0.077             | 14  |                    |
|      | 658   | 11.3         | 182                             | 1.3                   | 0.64            | 0.076             | 13  |                    |
|      | 661   | 11.3         | 182                             | 1.3                   | 0.74            | 0.085             | 11  |                    |
|      | 663   | 11.3         | 182                             | 1.3                   | 0.70            | 0.084             | 12  | 1.9                |
|      | 665   | 11.3         | 182                             | 1.3                   | 0.73            | 0.085             | 12  |                    |
|      | 667   | 11.3         | 182                             | 1.2                   | 0.76            | 0.091             | 17  |                    |
|      | 670   | 11.3         | 182                             | 1.3                   | 0.69            | 0.077             | 11  |                    |
|      | 672   | 11.3         | 182                             | 1.3                   | 0.74            | 0.088             | 13  | 2.4                |
|      | 674   | 11.3         | 182                             | 1.4                   | 0.68            | 0.076             | 12  |                    |
|      | 676   | 11.4         | 182                             | 1.3                   | 0.73            | 0.086             | 16  |                    |
|      | 679   | 11.4         | 182                             | 1.3                   | 0.73            | 0.088             | 17  |                    |
|      | 681   | 11.4         | 182                             | 1.3                   | 0.68            | 0.080             | 10  | 2.4                |
|      | 683   | 11.4         | 182                             | 1.3                   | 0.71            | 0.081             | 10  |                    |
|      | 685   | 11.4         | 182                             | 1.3                   | 0.74            | 0.088             | 14  |                    |
|      | 688   | 11.4         | 182                             | 1.3                   | 0.68            | 0.083             | 14  |                    |
|      | 690   | 11.4         | 182                             | 1.3                   | 0.68            | 0.079             | 12  | 2.3                |
|      | 692   | 11.4         | 182                             | 1.3                   | 0.70            | 0.083             | 11  |                    |
|      | 694   | 11.5         | 182                             | 1.3                   | 0.78            | 0.094             | 9.6 |                    |
|      | 697   | 11.5         | 182                             | 1.3                   | 0.76            | 0.089             | 10  |                    |
|      | 699   | 11.5         | 182                             | 1.3                   | 0.81            | 0.091             | 11  | 2.6                |
|      | 701   | 11.5         | 182                             | 1.3                   | 0.72            | 0.085             | 14  |                    |
|      | 703   | 11.5         | 182                             | 1.3                   | 0.73            | 0.087             | 9.3 |                    |
|      | 706   | 11.5         | 182                             | 1.3                   | 0.73            | 0.088             | 14  |                    |
|      | 708   | 11.5         | 182                             | 1.3                   | 0.74            | 0.087             | 14  |                    |
|      | 710   | 11.5         | 182                             | 1.3                   | 0.66            | 0.080             | 15  |                    |
|      | 712   | 11.6         | 182                             | 1.3                   | 0.63            | 0.076             | 13  |                    |
|      | 715   | 11.6         | 182                             | 1.3                   | 0.68            | 0.082             | 12  |                    |
|      | 717   | 11.6         | 182                             | 1.3                   | 0.73            | 0.094             | 9.2 |                    |
|      | 719   | 11.6         | 182                             | 1.3                   | 0.70            | 0.090             | 14  | 2.2                |
|      | 721   | 11.6         | 182                             | 1.3                   | 0.69            | 0.086             | 13  |                    |
|      | 724   | 11.6         | 182                             | 1.3                   | 0.67            | 0.085             | 12  |                    |
|      | 726   | 11.6         | 182                             | 1.3                   | 0.66            | 0.084             | 14  |                    |
|      | 728   | 11.6         | 182                             | 1.2                   | 0.68            | 0.087             | 11  |                    |
|      | 730   | 11.7         | 182                             | 1.3                   | 0.69            | 0.087             | 13  | 2.4                |
|      | 733   | 11.7         | 182                             | 1.3                   | 0.68            | 0.082             | 16  |                    |
|      | 735   | 11.7         | 182                             | 1.3                   | 0.71            | 0.089             | 11  |                    |
|      | 737   | 11.7         | 182                             | 1.3                   | 0.71            | 0.093             | 11  |                    |
|      | 739   | 11.7         | 182                             | 1.3                   | 0.70            | 0.090             | 9.0 |                    |
|      | 742   | 11.7         | 182                             | 1.3                   | 0.65            | 0.082             | 10  | 2.3                |

Supplementary Table S2. Calculated and measured parameters for sediment core PC-3, including TOC, TN, and Si<sub>OPAL</sub> contents, and C/N.

| Core | Depth | Age          | Linear<br>sedimentation<br>rate | Dry bulk<br>density   | Total org.<br>C | Total<br>nitrogen | C/N | Si <sub>OPAL</sub> |
|------|-------|--------------|---------------------------------|-----------------------|-----------------|-------------------|-----|--------------------|
|      | (cm)  | (cal kyr BP) | (cm kyr <sup>-1</sup> )         | (g cm <sup>-3</sup> ) | (wt %)          | (wt %)            |     | (wt %)             |
|      | 744   | 11.7         | 182                             | 1.3                   | 0.65            | 0.080             | 9.1 |                    |
|      | 746   | 11.7         | 182                             | 1.3                   | 0.67            | 0.088             | 8.3 |                    |
|      | 748   | 11.8         | 182                             | 1.3                   | 0.62            | 0.078             | 12  |                    |
|      | 751   | 11.8         | 182                             | 1.3                   | 0.65            | 0.081             | 13  | 2.5                |
|      | 753   | 11.8         | 182                             | 1.3                   | 0.67            | 0.087             | 13  |                    |
|      | 755   | 11.8         | 182                             | 1.3                   | 0.65            | 0.085             | 13  |                    |
|      | 757   | 11.8         | 182                             | 1.3                   | 0.66            | 0.084             | 10  |                    |
|      | 760   | 11.8         | 182                             | 1.3                   | 0.65            | 0.085             | 11  | 2.1                |
|      | 762   | 11.8         | 182                             | 1.3                   | 0.60            | 0.075             | 10  |                    |
|      | 764   | 11.8         | 182                             | 1.4                   | 0.65            | 0.083             | 17  |                    |
|      | 766   | 11.9         | 182                             | 1.3                   | 0.71            | 0.088             | 10  |                    |
|      | 769   | 11.9         | 182                             | 1.3                   | 0.70            | 0.084             | 9.1 |                    |
|      | 771   | 11.9         | 182                             | 1.3                   | 0.71            | 0.087             | 14  | 2.7                |
|      | 773   | 11.9         | 182                             | 1.3                   | 0.85            | 0.105             | 9.3 |                    |
|      | 775   | 11.9         | 182                             | 1.3                   | 0.63            | 0.078             | 14  |                    |
|      | 778   | 11.9         | 182                             | 1.4                   | 0.60            | 0.077             | 14  |                    |
|      | 780   | 11.9         | 182                             | 1.4                   | 0.60            | 0.077             | 13  | 2.3                |
|      | 782   | 11.9         | 182                             | 1.4                   | 0.62            | 0.077             | 12  |                    |
|      | 784   | 12.0         | 182                             | 1.3                   | 0.64            | 0.082             | 11  |                    |
|      | 787   | 12.0         | 182                             | 1.3                   | 0.67            | 0.086             | 8.6 |                    |
|      | 789   | 12.0         | 182                             | 1.3                   | 0.76            | 0.096             | 11  |                    |
|      | 791   | 12.0         | 182                             | 1.3                   | 0.70            | 0.087             | 14  | 2.4                |
|      | 793   | 12.0         | 182                             | 1.3                   | 0.70            | 0.087             | 12  |                    |
|      | 796   | 12.0         | 182                             | 1.3                   | 0.74            | 0.090             | 12  |                    |
|      | 798   | 12.0         | 182                             | 1.3                   | 0.71            | 0.093             | 10  |                    |
|      | 800   | 12.0         | 182                             | 1.3                   | 0.68            | 0.084             | 14  | 2.5                |
|      | 802   | 12.1         | 182                             | 1.4                   | 0.69            | 0.086             | 12  |                    |
|      | 805   | 12.1         | 182                             | 1.3                   | 0.66            | 0.084             | 11  |                    |
|      | 807   | 12.1         | 182                             | 1.3                   | 0.67            | 0.085             | 12  |                    |
|      | 809   | 12.1         | 182                             | 1.3                   | 0.67            | 0.087             | 16  |                    |
|      | 811   | 12.1         | 182                             | 1.3                   | 0.68            | 0.087             | 14  | 2.3                |
|      | 814   | 12.1         | 182                             | 1.3                   | 0.64            | 0.085             | 12  |                    |
|      | 816   | 12.1         | 182                             | 1.3                   | 0.70            | 0.092             | 8.3 |                    |
|      | 818   | 12.1         | 182                             | 1.4                   | 0.67            | 0.083             | 10  |                    |
|      | 820   | 12.2         | 182                             | 1.3                   | 0.68            | 0.084             | 9.4 | 2.3                |
|      | 823   | 12.2         | 182                             | 1.3                   | 0.67            | 0.082             | 13  |                    |
|      | 825   | 12.2         | 182                             | 1.3                   | 0.74            | 0.083             | 12  |                    |
|      | 827   | 12.2         | 182                             | 1.3                   | 0.75            | 0.086             | 13  |                    |
|      | 829   | 12.2         | 182                             | 1.3                   | 0.69            | 0.079             | 17  |                    |
|      | 832   | 12.2         | 182                             | 1.4                   | 0.70            | 0.080             | 15  | 2.6                |
|      | 834   | 12.2         | 182                             | 1.3                   | 0.68            | 0.079             | 10  |                    |
|      | 836   | 12.2         | 182                             | 1.3                   | 0.67            | 0.077             | 16  |                    |
|      | 838   | 12.3         | 182                             | 1.3                   | 0.65            | 0.070             | 11  |                    |
|      | 841   | 12.3         | 182                             | 1.3                   | 0.63            | 0.069             | 12  | 2.3                |
|      | 843   | 12.3         | 182                             | 1.4                   | 0.61            | 0.073             | 16  |                    |
|      | 845   | 12.3         | 182                             | 1.3                   | 0.64            | 0.077             | 14  |                    |
|      | 847   | 12.3         | 182                             | 1.4                   | 0.54            | 0.061             | 18  |                    |
|      | 850   | 12.3         | 182                             | 1.3                   | 0.69            | 0.082             | 9.7 |                    |
|      | 852   | 12.3         | 182                             | 1.3                   | 0.67            | 0.076             | 18  |                    |
|      | 854   | 12.3         | 182                             | 1.4                   | 0.65            | 0.075             | 13  | 2.0                |
|      | 856   | 12.4         | 182                             | 1.4                   | 0.63            | 0.070             | 15  |                    |
|      | 859   | 12.4         | 182                             | 1.3                   | 0.70            | 0.073             | 11  |                    |
|      | 861   | 12.4         | 182                             | 1.3                   | 0.69            | 0.074             | 12  | 2.0                |
|      | 863   | 12.4         | 182                             | 1.4                   | 0.57            | 0.062             | 12  |                    |

Supplementary Table S2. Calculated and measured parameters for sediment core PC-3, including TOC, TN, and Si<sub>OPAL</sub> contents, and C/N.

| Core | Depth | Age          | Linear<br>sedimentation<br>rate | Dry bulk<br>density   | Total org.<br>C | Total<br>nitrogen | C/N | Si <sub>OPAL</sub> |
|------|-------|--------------|---------------------------------|-----------------------|-----------------|-------------------|-----|--------------------|
|      | (cm)  | (cal kyr BP) | (cm kyr <sup>-1</sup> )         | (g cm <sup>-3</sup> ) | (wt %)          | (wt %)            |     | (wt %)             |
|      | 865   | 12.4         | 182                             | 1.4                   | 0.60            | 0.069             | 16  |                    |
|      | 868   | 12.4         | 182                             | 1.4                   | 0.58            | 0.062             | 12  |                    |
|      | 870   | 12.4         | 182                             | 1.5                   | 0.54            | 0.059             | 18  | 2.3                |
|      | 872   | 12.4         | 182                             | 1.4                   | 0.60            | 0.067             | 15  |                    |
|      | 874   | 12.5         | 182                             | 1.4                   | 0.66            | 0.073             | 12  |                    |
|      | 876   | 12.5         | 182                             | 1.4                   | 0.71            | 0.075             | 19  |                    |
|      | 878   | 12.5         | 182                             | 1.4                   | 0.65            | 0.074             | 12  |                    |
|      | 880   | 12.5         | 182                             | 1.4                   | 0.65            | 0.073             | 14  |                    |
|      | 882   | 12.5         | 182                             | 1.4                   | 0.64            | 0.074             | 13  | 1.9                |
|      | 885   | 12.5         | 182                             | 1.3                   | 0.65            | 0.074             | 12  | 2.2                |
|      | 887   | 12.5         | 182                             | 1.3                   | 0.67            | 0.086             | 11  |                    |
|      | 889   | 12.5         | 182                             | 1.3                   | 0.71            | 0.087             | 10  |                    |
|      | 891   | 12.5         | 182                             | 1.3                   | 0.69            | 0.082             | 13  |                    |
|      | 894   | 12.6         | 182                             | 1.3                   | 0.66            | 0.078             | 10  | 1.9                |
|      | 896   | 12.6         | 182                             | 1.4                   | 0.69            | 0.083             | 12  |                    |
|      | 898   | 12.6         | 182                             | 1.4                   | 0.70            | 0.081             | 11  |                    |
|      | 900   | 12.6         | 182                             | 1.3                   | 0.70            | 0.087             | 11  |                    |
|      | 903   | 12.6         | 182                             | 1.3                   | 0.73            | 0.082             | 11  | 2.0                |
|      | 905   | 12.6         | 182                             | 1.3                   | 0.78            | 0.097             | 14  |                    |
|      | 907   | 12.6         | 182                             | 1.4                   | 0.73            | 0.089             | 12  |                    |
|      | 909   | 12.6         | 182                             | 1.3                   | 0.70            | 0.100             | 12  |                    |
|      | 912   | 12.7         | 182                             | 1.3                   | 0.65            | 0.087             | 11  |                    |
|      | 914   | 12.7         | 182                             | 1.4                   | 0.61            | 0.078             | 9.5 | 2.2                |
|      | 916   | 12.7         | 182                             | 1.4                   | 0.63            | 0.081             | 10  |                    |
|      | 918   | 12.7         | 182                             | 1.4                   | 0.64            | 0.083             | 13  |                    |
|      | 921   | 12.7         | 182                             | 1.5                   | 0.63            | 0.083             | 11  |                    |
|      | 923   | 12.7         | 182                             | 1.4                   | 0.58            | 0.078             | 15  | 1.3                |
|      | 925   | 12.7         | 182                             | 1.4                   | 0.57            | 0.076             | 8.7 |                    |
|      | 927   | 12.7         | 182                             | 1.4                   | 0.60            | 0.080             | 13  |                    |
|      | 930   | 12.8         | 182                             | 1.4                   | 0.61            | 0.079             | 11  |                    |
|      | 932   | 12.8         | 182                             | 1.5                   | 0.63            | 0.091             | 8.1 | 2.4                |
|      | 934   | 12.8         | 182                             | 1.4                   | 0.63            | 0.086             | 8.0 |                    |
|      | 936   | 12.8         | 182                             | 1.4                   | 0.63            | 0.084             | 8.9 |                    |
|      | 939   | 12.8         | 182                             | 1.4                   | 0.61            | 0.079             | 8.8 |                    |
|      | 941   | 12.8         | 182                             | 1.4                   | 0.64            | 0.083             | 12  |                    |
|      | 943   | 12.8         | 182                             | 1.4                   | 0.63            | 0.085             | 13  | 2.0                |
|      | 945   | 12.8         | 182                             | 1.4                   | 0.64            | 0.086             | 8.8 |                    |
|      | 948   | 12.9         | 182                             | 1.4                   | 0.62            | 0.084             | 8.9 |                    |
|      | 950   | 12.9         | 182                             | 1.4                   | 0.62            | 0.086             | 8.8 |                    |
|      | 952   | 12.9         | 182                             | 1.4                   | 0.63            | 0.086             | 10  | 1.6                |
|      | 954   | 12.9         | 182                             | 1.4                   | 0.64            | 0.090             | 9.9 |                    |
|      | 957   | 12.9         | 182                             | 1.4                   | 0.56            | 0.077             | 13  |                    |
|      | 959   | 12.9         | 182                             | 1.4                   | 0.62            | 0.086             | 7.9 |                    |
|      | 961   | 12.9         | 182                             | 1.4                   | 0.63            | 0.085             | 8.4 | 1.7                |
